# Supplementary material for: Efficient targeted cancer cell detection, isolation and enumeration using immuno-nano/hybrid magnetic microgels
Source: Royal Society of Chemistry journal article supplement (doi:10.1039/c9bm00552h), 2019-01-01
Supplement: c9bm00552h1.pdf [file c9bm00552h1.pdf]

## Supporting information for:

### **Efficient Targeted Cancer Cell Detection, Isolation and Enumeration using Immuno-Nano/hybrid Magnetic microgels**

*Amir Seyfoori<sup>1,2,3</sup>, S.A. Seyyed Ebrahimi<sup>\*</sup>, Arman Yousefi<sup>1</sup>, Mohsen Akbari<sup>2,4,5\*</sup>*

<sup>1</sup> Advanced Magnetic Materials Research Center, College of Engineering, University of Tehran, Tehran, Iran

<sup>2</sup>Laboratory for Innovations in Micro Engineering (LiME), Department of Mechanical Engineering, University of Victoria, Victoria, Canada, V8P 5C2.

<sup>3</sup>Biomaterials and Tissue Engineering Department, Breast Cancer Research Center, Motamed Cancer Institute, ACECR, Tehran, Iran

<sup>4</sup>Center for Biomedical Research, University of Victoria, Victoria, Canada, V8P 5C2.

<sup>5</sup>Center for Advanced Materials and Related Technologies, University of Victoria, Victoria, Canada, V8P 5C2.

Corresponding author: <sup>1</sup> [saseyyed@ut.ac.ir](mailto:saseyyed@ut.ac.ir), <sup>2,4,5</sup> [makbari@uvic.ca](mailto:makbari@uvic.ca)

Supporting information contains 7 figures:

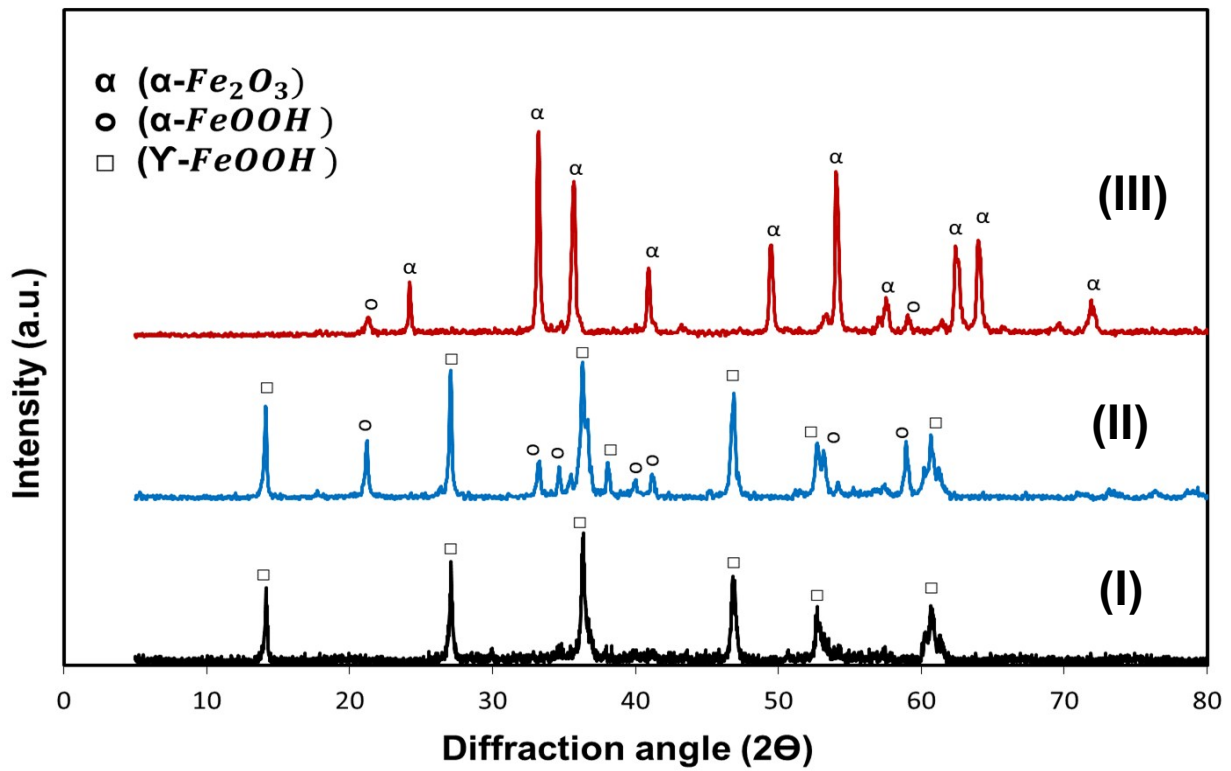

Fig. S1 : B) XRD patterns of the samples with different hydrolysis temperature I) T=70, II) T=85 and III) T=100.

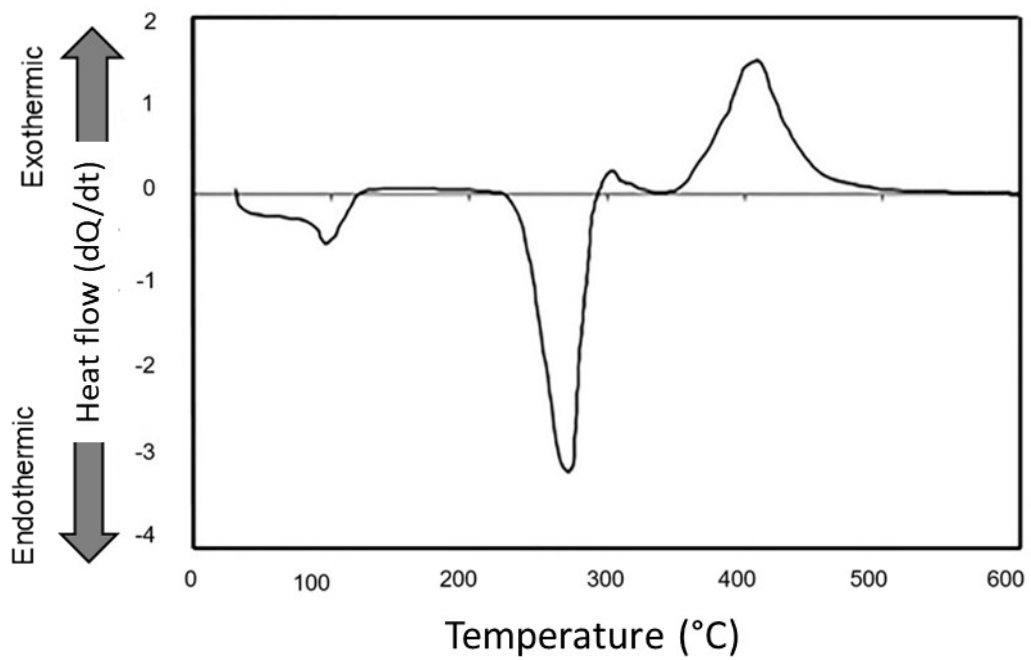

Fig. S2: DSC profile for lepidocrocite nanorods heating up to 600 °C in air atmosphere.

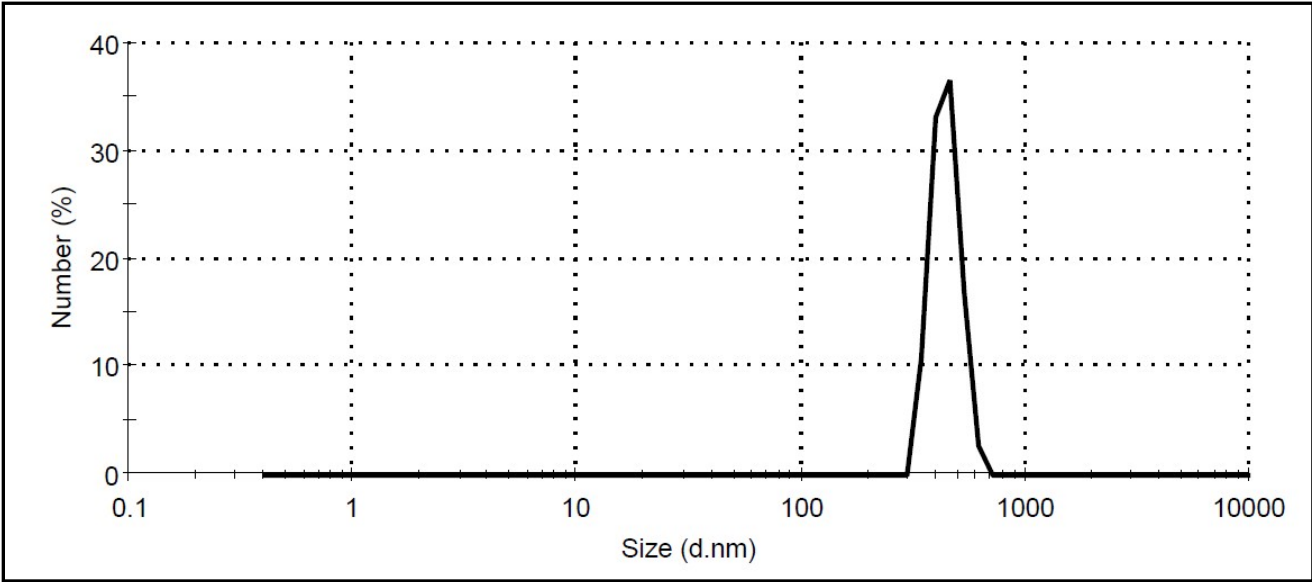

Fig. S3: DLS analysis of the pure synthesized PNIPAM-AA microgel

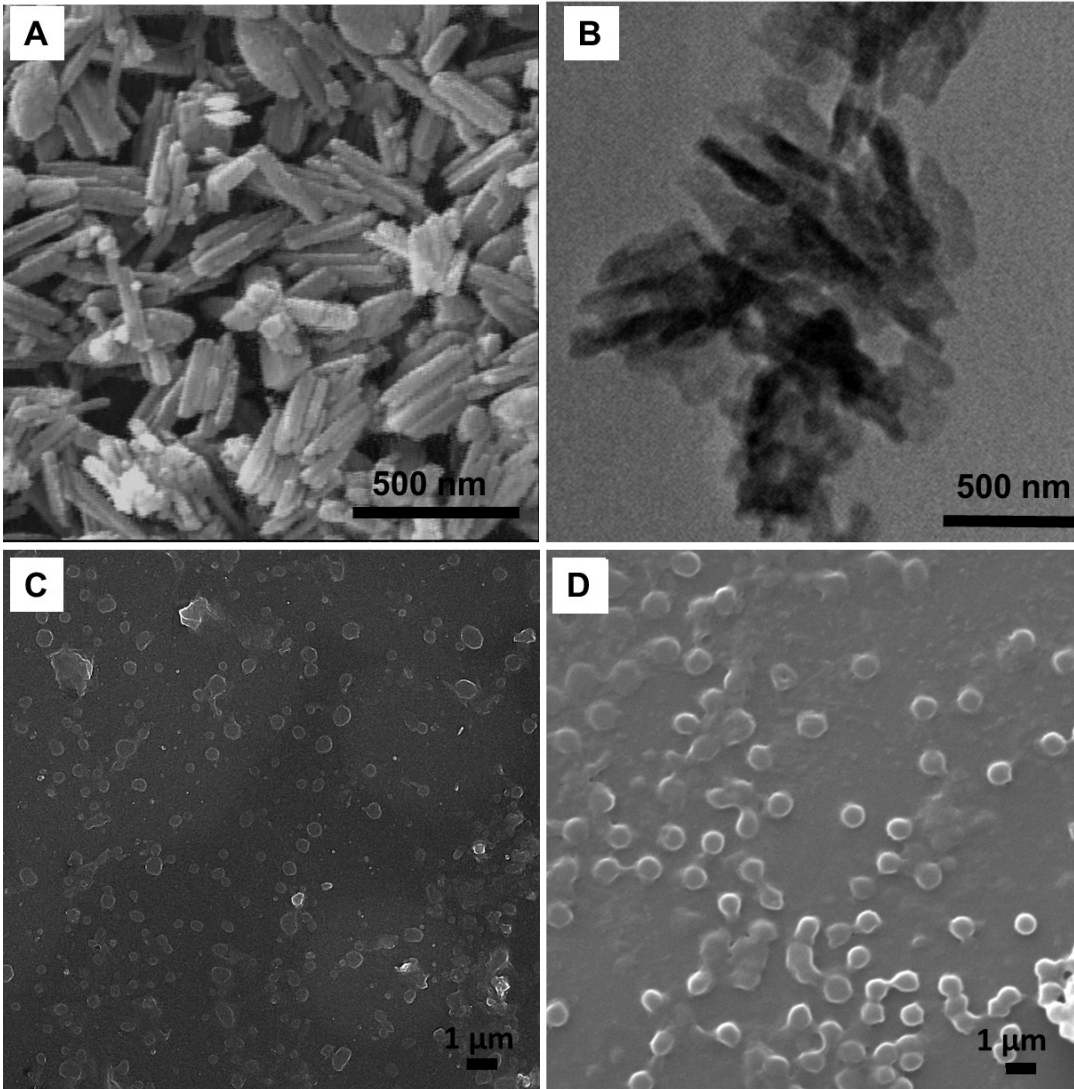

Fig. S4. A) SEM image and B) TEM image of the chitosan coated mNRs. C) SEM image of the synthesized PNIPAM-AA microgels and D) hybrid microgels after mNR attachment.

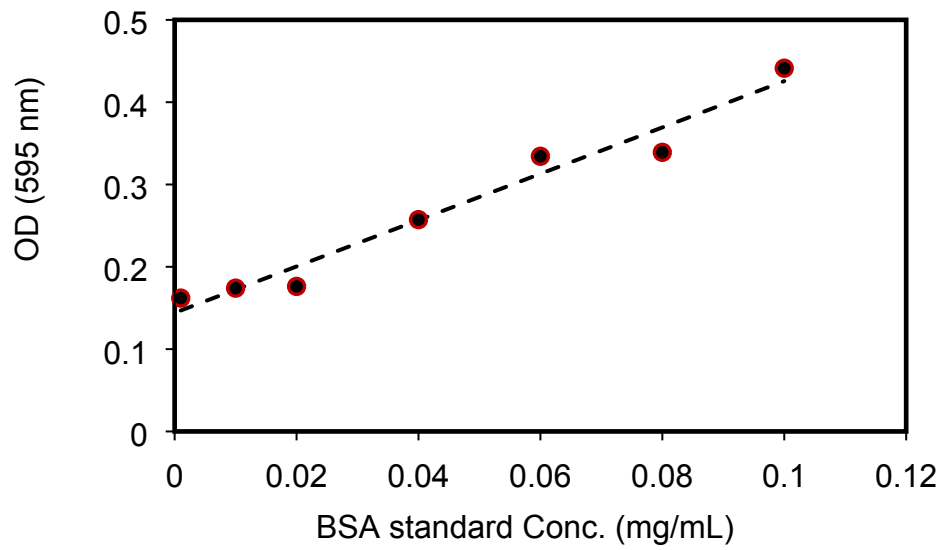

Fig. S5. Standard curve of the BSA protein using Bradford assay for antibody quantification.

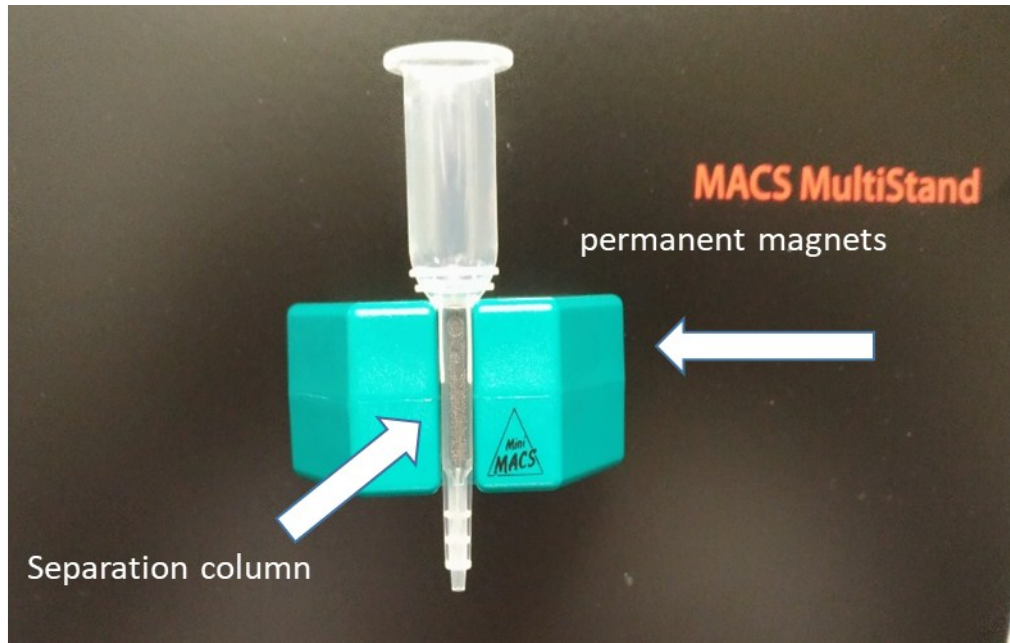

Fig. S6: MACS apparatus for CTC isolation containing separation column and permanent magnet

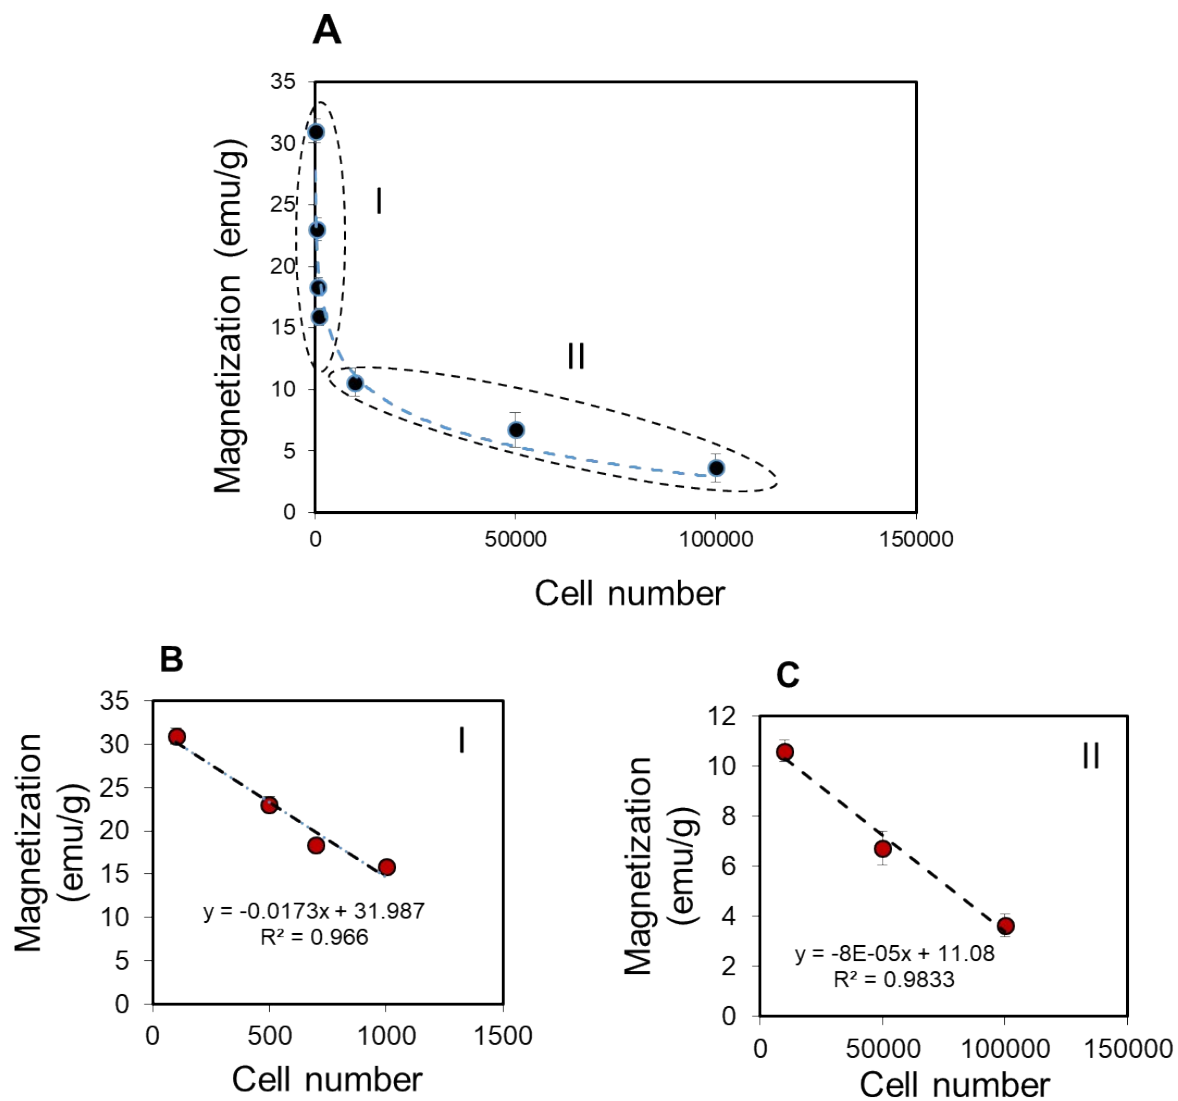

Fig. S7: A) Calibration plot between the magnetization of the labeled cells versus different SKBR-3 cell numbers. Error bars represent the standard deviations of five replicates. B,D) Calibration curve at 2 different linear range of the main curve.
